# Supplementary material
Source: publisher figshare collection journal article supplement (https://gsajournals.figshare.com/articles/dataset/_/8223794)

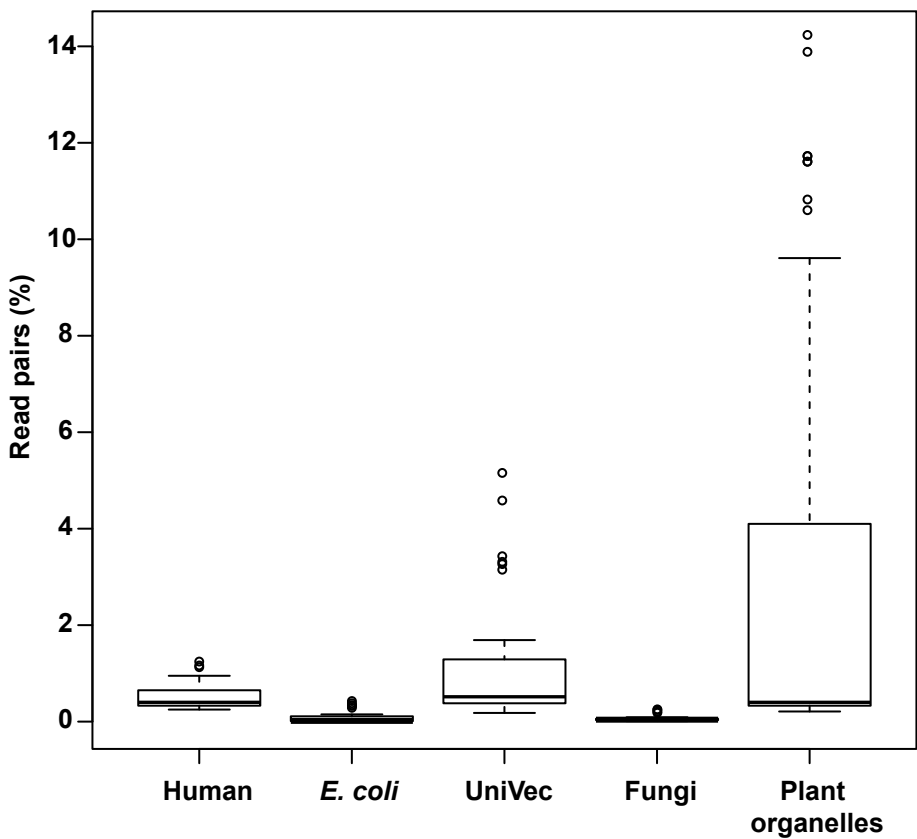

Supplement: Supplementary file 2 [file 1]

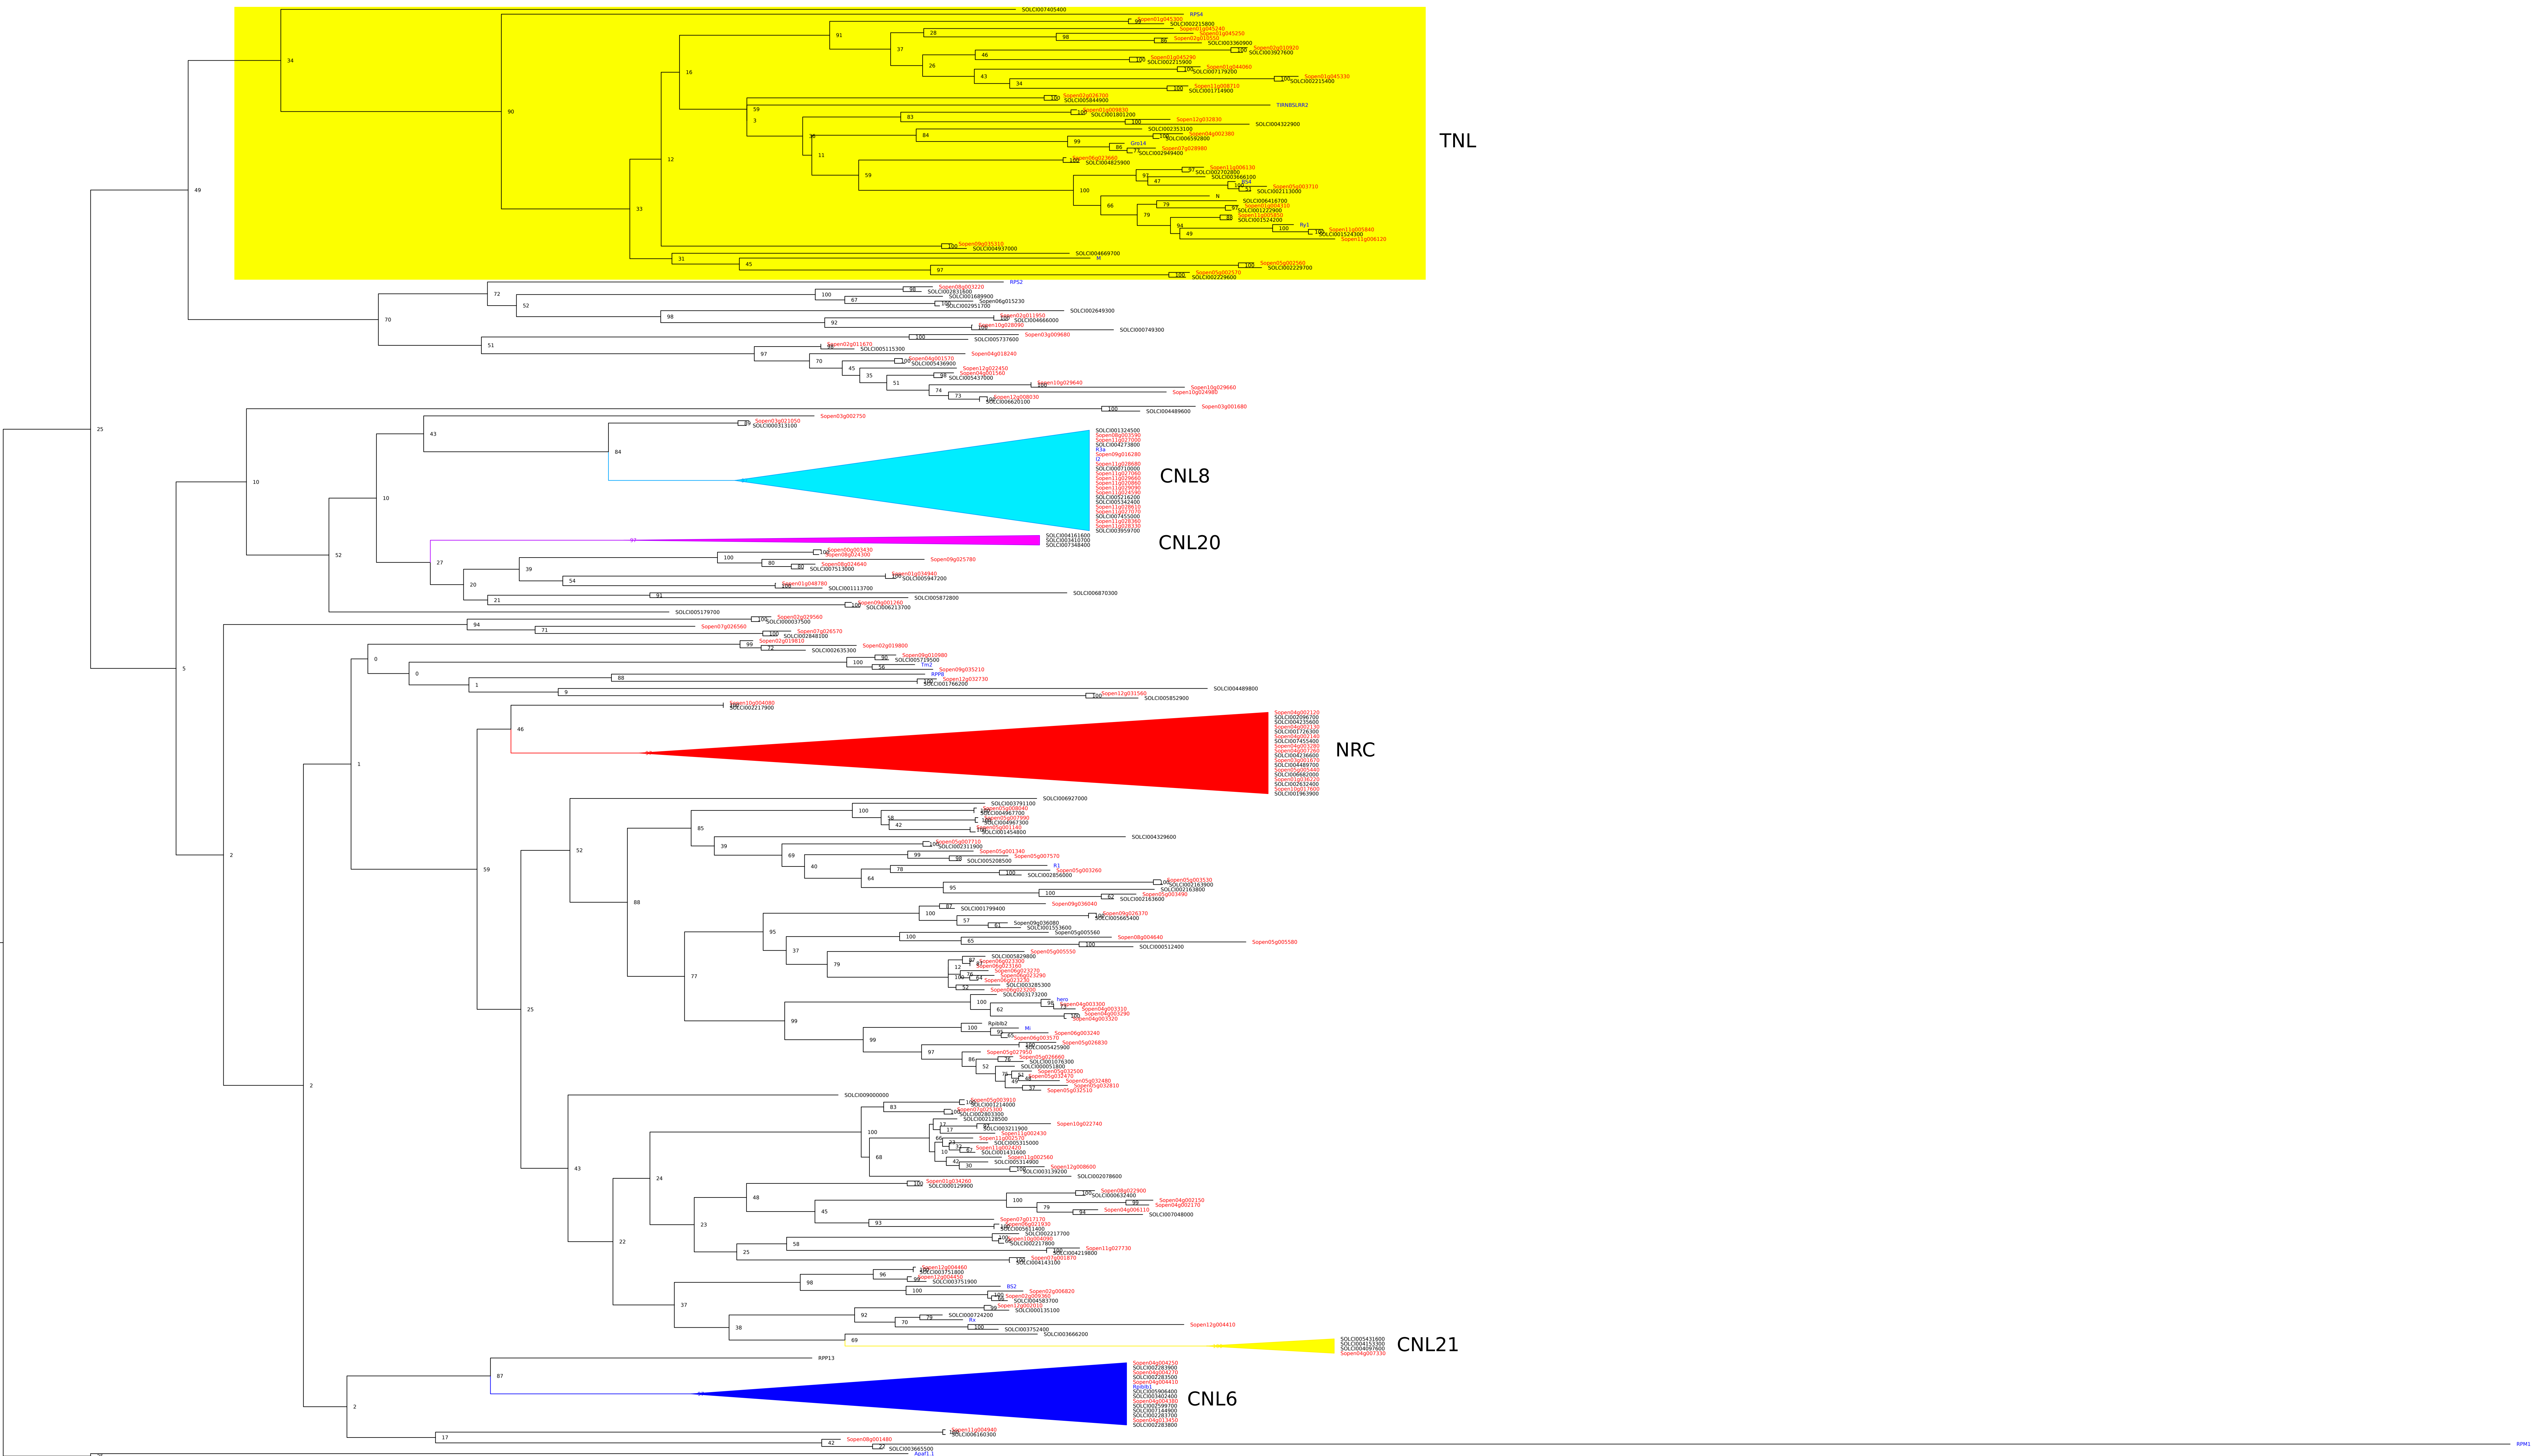

TNL

CNL8

CNL20

NRC

CNL21

CNL6

Supplement: Supplementary file 3 [file 1]
